# Supplementary material for: Exosome-Derived LINC00960 and LINC02470 Promote the Epithelial-Mesenchymal Transition and Aggressiveness of Bladder Cancer Cells
Source: MDPI journal article supplement (doi:10.3390/cells9061419), 2020-06-07
Supplement: s1 [file s1]

**Supplementary Table S1. Primer sequences in the study**

|           |                 |                         |
|-----------|-----------------|-------------------------|
| AATBC     | Forward (5'-3') | GGCTGGGCTCCAAAGCTTGA    |
|           | Reverse (5'-3') | CTGTTGGTGTGCGGTCCCT     |
| LINC00958 | Forward (5'-3') | TGGATTCATGCTTCGCACCCC   |
|           | Reverse (5'-3') | AGATCTCAGCAGCTCCGGCT    |
| LINC00960 | Forward (5'-3') | CCTCTAAGCCTAAGCACCGCC   |
|           | Reverse (5'-3') | GGAAGCCTGGGCAAGGAATGG   |
| SNHG18    | Forward (5'-3') | CCCCACCTCACAGCCAAGTT    |
|           | Reverse (5'-3') | TGCGAGTCAGCGCATCTTCT    |
| MIR4697HG | Forward (5'-3') | CCACGGTCTCTGCACAAGGG    |
|           | Reverse (5'-3') | TGCATGTGGCCAGAAGTCGG    |
| MEG3      | Forward (5'-3') | CTGAGGCCTAGGGGAGCTGT    |
|           | Reverse (5'-3') | AGCCCTGTGCTTTGGAACCG    |
| TRMU      | Forward (5'-3') | GGGGTCTGTACTGCCGACAA    |
|           | Reverse (5'-3') | GCATCCTGGGAAACCTGGCATT  |
| IGFL2-AS1 | Forward (5'-3') | GCCCCAAGGGGCTCATTACACA  |
|           | Reverse (5'-3') | TGTGTAAGTAACACGTCCTGGGT |
| LINC01451 | Forward (5'-3') | TGAGCTGTGCATCCCGTGTG    |
|           | Reverse (5'-3') | CGCCACAGTCCGTGTGTGAT    |
| GLIDR     | Forward (5'-3') | CGAATCCACCCATTGCCCGT    |
|           | Reverse (5'-3') | GAGGCGTCTCTTCCGTGCAG    |
| LOC728673 | Forward (5'-3') | TGACGGGCGAGGGTTACTGT    |
|           | Reverse (5'-3') | CCGCTCAGGCTCAAGAGCAA    |
| LINC01637 | Forward (5'-3') | ACCCTGAAAACGGGCTCGGA    |
|           | Reverse (5'-3') | GCGATGCGGGGACATGAGTA    |
| LINC01291 | Forward (5'-3') | GTGACCAGCAGCATGTGTTTCCA |
|           | Reverse (5'-3') | CAGGACTCACTGGCAATTCACCT |
| LINC02470 | Forward (5'-3') | CAGCAGACCAACACGCCAGA    |
|           | Reverse (5'-3') | GCTCCATCTGCCCACATCCA    |
| XIST      | Forward (5'-3') | TGGCCAACAGGTGGCAGAAG    |
|           | Reverse (5'-3') | CCCCAGCATTAGCCAAGGGG    |
| KLF3-AS1  | Forward (5'-3') | GATGAGCACACACGTACGGA    |
|           | Reverse (5'-3') | TCCACGCACTCATTACGCCA    |
| SSTR5-AS1 | Forward (5'-3') | GTGCTGCTGCCCTCGTCTAC    |
|           | Reverse (5'-3') | CCTGTGCCTGGACTTCGCTC    |
| GAPDH     | Forward (5'-3') | CCTGCCGGTGACTAACCCTG    |
|           | Reverse (5'-3') | TCCACCACTGACACGTTGGC    |

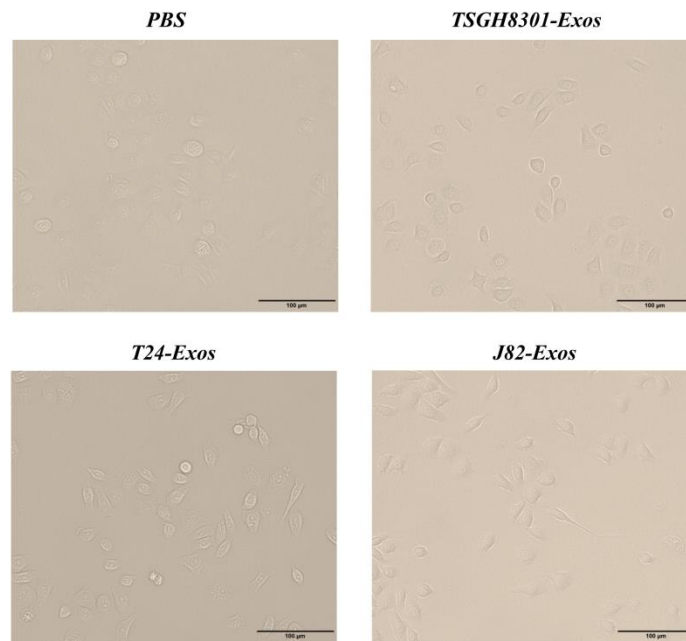

**Supplementary Figure S1.** The morphology of the low-grade cells gradually changes into spindle-shaped mesenchymal-like after treatment of high-grade bladder cancer cells conditioned media.

**A**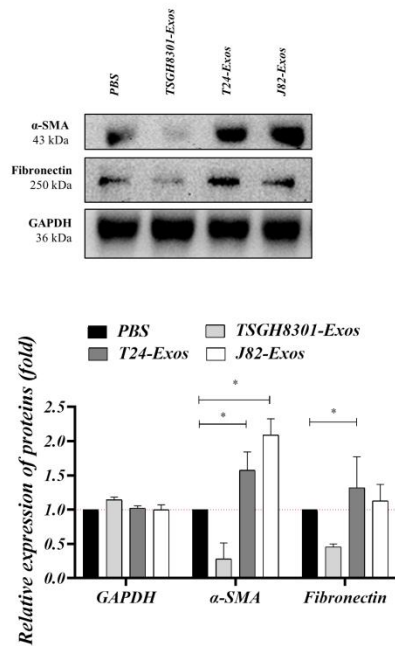**B**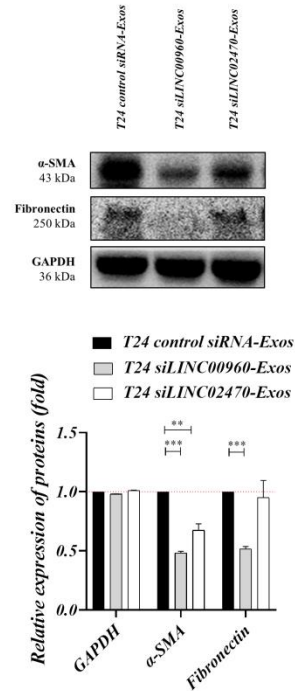

**Supplementary Figure S2.** (A) Exosomes mediated the expression of EMT effectors:  $\alpha$ -SMA and Fibronectin were compared after treatment with exosomes. (B) Exosomes derived from LINC00960-knockdown or LINC02470-knockdown T24 cell reduced the expression levels of EMT effectors,  $\alpha$ -SMA and Fibronectin, in recipient TSGH-8301 cells when compared after treatment with each exosome. The bar-charts showed the mean and SD of triplicate experiments, \*  $p < 0.05$ , \*\*  $p < 0.01$ , \*\*\*  $p < 0.001$ .
